# Supplementary material for: Ni–NiO core–shell inverse opal electrodes for supercapacitors
Source: Royal Society of Chemistry journal article supplement (doi:10.1039/c0cc05191h), 2011-01-01
Supplement: c0cc05191h.pdf [file c0cc05191h.pdf]

## Supporting Information

### Ni-NiO core-shell inverse opal electrode for supercapacitors

Jae-Hun Kim, Soon Hyung Kang, Kai Zhu,\* Jin Young Kim, Nathan R. Neale and Arthur J. Frank\*

*Chemical and Materials Science Center, National Renewable Energy Laboratory, Golden, Colorado 80401, USA*

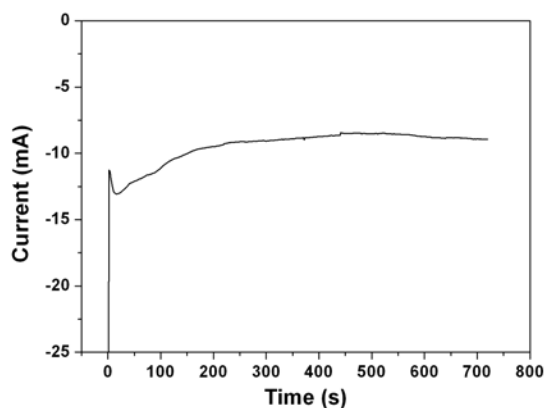

**Figure S1.** Current-time profile for the potentiostatic deposition of Ni metal.

Figure S1 shows the current-time profile for the potentiostatic deposition of Ni metal within the pores of the polystyrene opal template on fluorine-doped tin oxide substrate. The deposition potential was held at -1 V (vs. Ag/AgCl).

---

\* To whom correspondence should be addressed. E-mail: Kai.Zhu@nrel.gov; Arthur.Frank@nrel.gov.

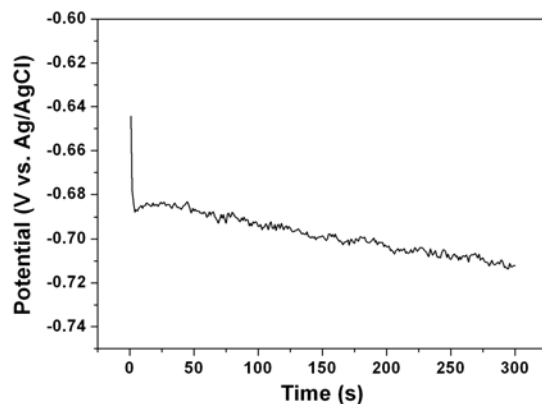

**Figure S2.** Voltage-time profile for the galvanostatic deposition of Ni(OH)<sub>2</sub>.

Figure S2 shows the voltage profile for the galvanostatic deposition of Ni(OH)<sub>2</sub> on the surface of Ni inverse opal structure. The deposition current was held at 1 mA cm<sup>-2</sup>.

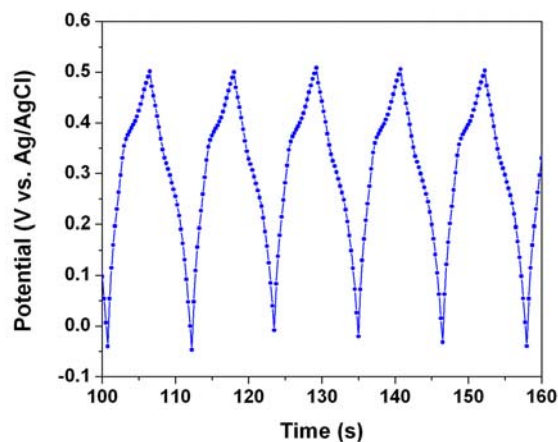

**Figure S3.** Typical voltage profiles of the Ni-NiO inverse opal electrode cycled at 1 mA cm<sup>-2</sup>.

Figure S3 shows several cycles of representative voltage profiles of the Ni-NiO inverse opal electrode from galvanostatic charge/discharge measurements performed at 1 mA cm<sup>-2</sup>. No significant current-resistance drop is observed.

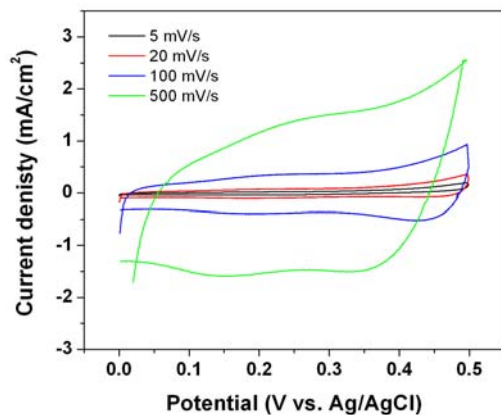

**Figure S4.** Cyclic voltammograms of the NiO nanoparticle electrode at various scan rates (5–500 mV/s).

Figure S4 shows the cyclic voltammograms of the NiO nanoparticle electrode in the potential window from 0.0 to 0.5 V (vs. Ag/AgCl). The scan rate varies from 5 to 500 mV/s. At the lowest scan rate (5 mV/s), the specific capacitance of the nanoparticle electrode was about 10 F/g.
